# Supplementary material for: Analysis of the optimality of the standard genetic code
Source: Royal Society of Chemistry journal article supplement (doi:10.1039/c6mb00262e), 2016-06-09
Supplement: c6mb00262e1.pdf [file c6mb00262e1.pdf]

### Analysis of the optimality of the Standard Genetic Code.

Balaji Kumar and Supreet Saini\*

Department of Chemical Engineering, Indian Institute of Technology Bombay, Powai, Mumbai - 400 076, India [\*Corresponding Author: Email: [saini@che.iitb.ac.in](mailto:saini@che.iitb.ac.in), Phone: 91 22 2576 7216]

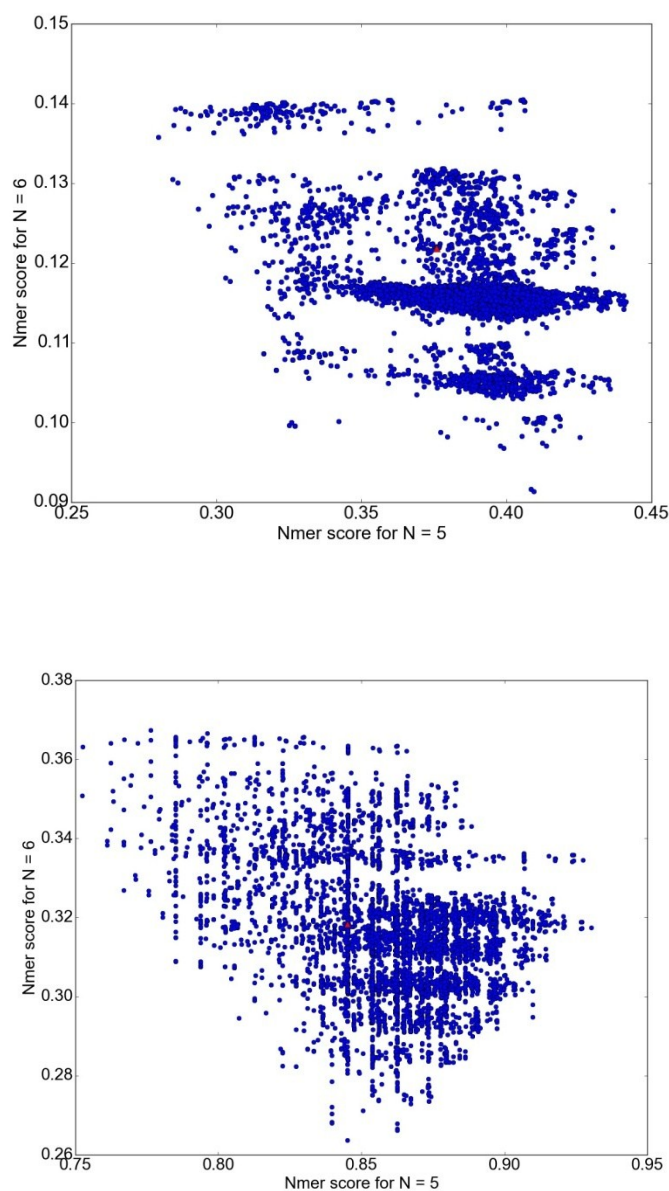

**Figure S1 (Top)** Performance of the 5472 codes at encoding additional information, when different parameters are considered. For each code, probability of encoding its top X% most difficult N-mers is plotted for N = 5 and N = 6, for X = 10. **Figure S1 (Bottom)** Performance of the 5472 codes at encoding additional information, when different parameters are considered. For each code, probability of encoding its top X% most difficult N-mers is plotted for N = 5 and N = 6, for X = 25
